# Supplementary material
Source: MDPI journal article supplement (https://www.mdpi.com/2313-433X/9/9/187)
Supplement: s1 [file s1]

Supplemental materials

**Table S1.** Radiography Imaging Equipment used in Institution 2

|                                       | Examination room1                           | Examination room2                              | Examination room3                                               |
|---------------------------------------|---------------------------------------------|------------------------------------------------|-----------------------------------------------------------------|
| <b>X-ray generator</b>                | BENEO<br>FUJIFILM Medical Corporation       | RAD speed Pro<br>SHIMADZU Corporation          | Radnext 80<br>FUJIFILM Healthcare Corporation                   |
| <b>X-ray detector (scintillator)</b>  | BENEO(a-Se)<br>FUJIFILM Medical Corporation | CALNEO MT(GOS)<br>FUJIFILM Medical Corporation | CALNEO C 1717 wireless SQ (CsI)<br>FUJIFILM Medical Corporation |
| <b>Scattered Radiation Correction</b> | Real Grid                                   | Real Grid                                      | Real Grid                                                       |
| Grid ratio                            | 10:1<br>Mitaya Corporation                  | 8:1<br>Mitaya Corporation                      | 8:1<br>Mitaya Corporation                                       |

**Table S2.** MRI imaging Equipment and Magnetic Field Strength used in Institution 2

|                                    | Examination room1                     | Examination room2                      | Examination room3                    | Examination room4                     | Examination room5                          |
|------------------------------------|---------------------------------------|----------------------------------------|--------------------------------------|---------------------------------------|--------------------------------------------|
| <b>MRI system</b>                  | MAGNETOM Avanto<br>SIEMENS Healthcare | Discovery MR750w 3.0T<br>GE Healthcare | TRILLIUM OVAL<br>FUJIFILM Healthcare | Achieva dStream<br>Philips Healthcare | Ingenia Elition 3.0T<br>Philips Healthcare |
| <b>Magnetic field strength (T)</b> | 1.5                                   | 3.0                                    | 3.0                                  | 1.5                                   | 3.0                                        |

**Table S3.** Details of the Image Enhancement Process by the ImageAugmentation Layer on NNC.

|                   | Parameter Range |      |
|-------------------|-----------------|------|
|                   | Min             | Max  |
| Image scaling     | 0.8             | 1.05 |
| Image rotation    | -20°            | +20° |
| Brightness change | -0.2            | +0.2 |
| Contrast change   | 1/1.5           | 1.5  |
